# Supplementary material for: Digital strategies to improve the product quality and production efficiency of fluorinated polymers: 2. Heat removal performance of reactor with internal and external cooling systems
Source: Royal Society of Chemistry journal article supplement (doi:10.1039/d4re00203b), 2024-10-07
Supplement: d4re00203b1.pdf [file d4re00203b1.pdf]

Supporting Information for  
**Digital Strategies to Improve Product Quality and Production  
Efficiency of Fluorinated Polymers: 2. Heat Removal  
Performance of Reactor with Internal and External Cooling**

Xi-Bao Zhang,<sup>2</sup> Yin-Ning Zhou,<sup>2</sup> Hao Chen,<sup>2</sup> Zheng-Hong Luo,<sup>2,\*</sup> Liyang Zhou,<sup>1,\*</sup> Guojun  
Yu,<sup>1</sup> Wenwu Liu,<sup>1</sup> Shiping Zhu<sup>3,\*</sup>

<sup>1</sup>Zhejiang Juhua Co. Ltd., Quzhou 324004, P.R. China

<sup>2</sup>Department of Chemical Engineering, School of Chemistry and Chemical Engineering,  
Shanghai Jiao Tong University, Shanghai 200240, P. R. China

<sup>3</sup>School of Science and Engineering, The Chinese University of Hong Kong, Shenzhen 518172,  
P. R. China

Corresponding Author: Professor L.Y. Zhou, Email: fhzly@juhua.com; Professor Z.H.

Luo, E-mail: luozh@sjtu.edu.cn; Professor S.P. Zhu, E-mail: shipingzhu@cuhk.edu.cn

## Data Associated with Figures

**Figure 1:** No data associated.

**Figure 2:** No data associated.

**Figure 3:** No data associated.

**Figure 4:**

Data in Fig. 4b

|          | J        | 1:9      | 3:7      | 5:5      | 7:3      | 9:1      | A        |
|----------|----------|----------|----------|----------|----------|----------|----------|
| Region 1 | 331.4686 | 331.2182 | 331.1393 | 331.1159 | 331.0862 | 331.1156 | 331.2204 |
| Region 1 | 331.3007 | 331.0622 | 330.9798 | 330.9628 | 330.926  | 330.985  | 331.2014 |
| Region 3 | 331.0997 | 330.9277 | 330.8903 | 330.8937 | 330.8566 | 330.9724 | 331.3172 |

Data in Fig. 4c

|                      | J      | 1:9    | 3:7   | 5:5    | 7:3    | 9:1    | A     |
|----------------------|--------|--------|-------|--------|--------|--------|-------|
| $\Delta T_{max}$ (K) |        |        |       |        |        |        | 0.115 |
|                      | 0.3689 | 0.2905 | 0.249 | 0.2222 | 0.2296 | 0.1432 | 8     |

Data in Fig. 4d

|           | J       | 1:9     | 3:7     | 5:5     | 7:3    | 9:1     | A       |
|-----------|---------|---------|---------|---------|--------|---------|---------|
| $E_T$ (%) | 0.03793 | 0.02769 | 0.02136 | 0.01936 | 0.0201 | 0.01408 | 0.01578 |

Data in Fig. 4e

|              | J        | 1:9      | 3:7      | 5:5      | 7:3     | 9:1      | A        |
|--------------|----------|----------|----------|----------|---------|----------|----------|
| $h_T$ (kJ/s) | 179.8017 | 274.3714 | 299.8516 | 302.9219 | 317.818 | 284.4913 | 177.574  |
| $h_A$ (kJ/s) |          | 100.2582 | 140.0977 | 153.5820 | 163.677 | 172.6280 | 177.5741 |
| $h_J$ (kJ/s) | 179.8017 | 174.113  | 159.754  | 149.3398 | 154.141 | 111.863  |          |

**Figure 5:** No data associated.

**Figure 6:** No data associated.

**Figure 7:** No data associated.

**Figure 8:**

Data in Fig. 8b

|          | 10 rpm   | 30 rpm   | 60 rpm   | 120 rpm  |
|----------|----------|----------|----------|----------|
| Region 1 | 331.3711 | 331.1159 | 330.9068 | 330.7499 |
| Region 1 | 331.1751 | 330.9628 | 330.8062 | 330.6987 |
| Region 3 | 330.9982 | 330.8937 | 330.7727 | 330.6881 |

Data in **Fig. 8c**

|                      | 10 rpm | 30 rpm | 60 rpm | 120 rpm |
|----------------------|--------|--------|--------|---------|
| $\Delta T_{max}$ (K) | 0.3729 | 0.2222 | 0.1341 | 0.0618  |

Data in **Fig. 8d**

|           | 10 rpm  | 30 rpm  | 60 rpm  | 120 rpm |
|-----------|---------|---------|---------|---------|
| $E_T$ (%) | 0.03592 | 0.01936 | 0.01209 | 0.00583 |

Data in **Fig. 8e**

|              | 10 rpm    | 30 rpm    | 60 rpm    | 120 rpm   |
|--------------|-----------|-----------|-----------|-----------|
| $h_T$ (kJ/s) | 224.54159 | 302.92186 | 371.57004 | 426.52934 |
| $h_A$ (kJ/s) | 100.16677 | 153.58203 | 205.64916 | 256.67224 |
| $h_J$ (kJ/s) | 124.37482 | 149.33983 | 165.92088 | 169.8571  |

**Figure 9:** No data associated.

**Figure 10:** No data associated.
